# Supplementary material
Source: PubMed Central journal article supplement (PMC3530875)
Supplement: 97320630081220S1.pdf [file 97320630081220S1.pdf]

## Supplementary material:

**Table 1:** The number of interactions based on angle and distance between all possible types of aromatic pairs. The aromatic pair with the most number of interactions is highlighted.

| Aromatic amino acid pairs | Number of Interactions (based on angle)(°) | Number of Interactions (based on distance)(Å) |
|---------------------------|--------------------------------------------|-----------------------------------------------|
| PHE:PHE                   | 15055                                      | 28495                                         |
| PHE:TYR                   | 18762                                      | 35303                                         |
| PHE:TRP                   | 9217                                       | 17360                                         |
| TYR:TYR                   | 7217                                       | 13420                                         |
| TYR:TRP                   | 6731                                       | 12693                                         |
| TRP:TRP                   | 1931                                       | 3679                                          |
| PHE:HIS                   | 7660                                       | 15073                                         |
| PHE:IND                   | 7740                                       | 14582                                         |
| TRP:IND                   | 3358                                       | 6261                                          |
| TYR:HIS                   | 6304                                       | 12286                                         |
| TYR:IND                   | 5808                                       | 10993                                         |
| HIS:HIS                   | 5008                                       | 9649                                          |
| HIS:IND                   | 2806                                       | 5469                                          |
| IND:IND                   | 1459                                       | 2718                                          |
| TRP:HIS                   | 2791                                       | 4256                                          |

**Table 2:** Number of interactions between the aromatic residues. The distance interval in which maximum numbers of interactions occur is highlighted.

| Distance Intervals (Å) | Val Number of Interactions |
|------------------------|----------------------------|
| <=5                    | 19882                      |
| 5-5.5                  | 32215                      |
| 5.5-6                  | 36557                      |
| 6-6.5                  | 37018                      |
| 6.5-7                  | 34336                      |
| 7-7.5                  | 33471                      |

**Table 3:** Number of specific and non-specific interactions. The distance interval in which maximum number of specific and non-specific interactions occurs is highlighted.

| Distance (Å) | Specific | Non-Specific |
|--------------|----------|--------------|
| <=5          | 20       | 19           |
| 5-5.5        | 23       | 22           |
| 5.5-6        | 34       | 23           |
| 6-6.5        | 48       | 35           |
| 6.5-7        | 68       | 44           |
| 7-7.5        | 49       | 49           |
